# Supplementary material for: Pre-Operative Decitabine in Colon Cancer Patients: Analyses on WNT Target Methylation and Expression
Source: MDPI journal article supplement (doi:10.3390/cancers13102357), 2021-05-13
Supplement: s1 [file s1]

|    | Hb (mmol/L) |      | Leucocytes (x 10 <sup>9</sup> /L) |      | Thrombocytes (x 10 <sup>9</sup> /L) |      |
|----|-------------|------|-----------------------------------|------|-------------------------------------|------|
|    | Pre         | Post | Pre                               | Post | Pre                                 | Post |
| 1  | 6.8         | 6.8  | 10                                | na   | 361                                 | na   |
| 2  | 10.0        | 9.3  | 6.2                               | 5.1  | 222                                 | 155  |
| 3  | 8.7         | 9.0  | 10.3                              | 7.5  | 218                                 | 194  |
| 4  | 9.0         | 8.5  | 10.0                              | 6.3  | 221                                 | 144  |
| 5  | 8.5         | 7.9  | 9.2                               | 6.9  | 281                                 | 245  |
| 6  | 8.9         | 8.1  | 9.1                               | 8.3  | 258                                 | 215  |
| 7  | 9.3         | 8.5  | 9.4                               | 6.3  | 283                                 | 207  |
| 8  | 7.1         | 6.7  | 8.4                               | 7.6  | 457                                 | 358  |
| 9  | 9.4         | 7.5  | 6.0                               | 4.6  | 300                                 | 197  |
| 10 | 10.1        | 8.2* | 7.0                               | 5.4* | 187                                 | 130* |

\* Samples were taken the day after surgery

na = not available
