# Supplementary material for: Pre-Operative Decitabine in Colon Cancer Patients: Analyses on WNT Target Methylation and Expression
Source: MDPI journal article supplement (doi:10.3390/cancers13102357), 2021-05-13
Supplement: s1 [file s1]

Table S2: Sequencing primers used for pyrosequencing

| Gene   | forward                        | reverse                        | sequencing          |
|--------|--------------------------------|--------------------------------|---------------------|
| APCDD1 | AGGTTTTAGAGTAGGATTGGAAATGT     | Biotin-ACCCCCTCTCCCAAACTA      | AGTAGGATTGGAAATGTT  |
| AXIN2  | GGGAGTAGTTTTTTTGGAGTTGAT       | Biotin-AACACAACCTTCCAAAAACC    | TTTTTGGAGTTGATGGTA  |
| DKK1   | Biotin-GGTTTTGTTGTTTTTTTTTAAGG | CACTTTACAAACCTAAATCCC          | ACAAAAACACAAAACCTCT |
| LINE1  | TTGAGTTAGGTGTGGGATATAGTT       | Biotin-CAAAAAATCAAAAAATCCCTTTC | ATTAGGGTGGGAGTGA    |
