# Supplementary material for: Pre-Operative Decitabine in Colon Cancer Patients: Analyses on WNT Target Methylation and Expression
Source: MDPI journal article supplement (doi:10.3390/cancers13102357), 2021-05-13
Supplement: s1 [file s1]

Table S4: Primers used for mutation analyses

| Gene     | Forward                  | Reverse                   |
|----------|--------------------------|---------------------------|
| KRAS     | GTGTGACATGTTCTAATATAGTCA | GAATGGTCCTGCACCAGTAA      |
| P53      | GCTTTCCACGACGGTGACA      | TTGTTGAGGGCAGGGGAGTA      |
|          | TGTCATCTTCTGTCCCTTCCC    | GATGGTGGTACAGTCAGAGC      |
|          | TTGCGTGTGGAGTATTTGGA     | CAGTGGTTTCTTCTTTGGCTG     |
|          | AAGAAAGGGGAGCCTCACCA     | GCAAGCAAGGGTTCAAAGACC     |
| BRAF wt  | AGGTGATTTTGGTCTAGCTACAGT | TAGTAACTCAGCAGCATCTCAGGGC |
| BRAF mut | AGGTGATTTTGGTCTAGCTACAGA | TAGTAACTCAGCAGCATCTCAGGGC |
