# Supplementary material for: Pre-Operative Decitabine in Colon Cancer Patients: Analyses on WNT Target Methylation and Expression
Source: MDPI journal article supplement (doi:10.3390/cancers13102357), 2021-05-13
Supplement: s1 [file s1]

Table S3: Primers used for rt-PCR

| Gene   | Forward                 | Reverse                    |
|--------|-------------------------|----------------------------|
| APCDD1 | CATCCAGACAGCAGGTCTCA    | GGGCCTGACCTTACTTCACA       |
| AXIN2  | CTCCTTATCGTGTGGGCAGT    | CTTCATCCTCTCGGATCTGC       |
| DDX58  | CCAGCATTACTAGTCAGAAGGAA | CACAGTGCAATCTTGTCATCC      |
| DKK1   | GCCCCGGAATTACTGCAAAAATG | CCGGAGACAAACAGAACCTTCTTGTC |
| ERVL   | ATATCCTGCCTGGATGGGGT    | GAGCTTCTTAGTCCTCCTGTGT     |
| GAPDH  | AATCCCATCACCATCTTCCA    | TGGA CTCCACGACGTACTCA      |
| LINE1  | TTACCCAGGGTGAATCACGA    | GGACATTGCGATTTCCATCTCT     |
| OASL   | GCAGAAATTTCCAGGACCAC    | CCCATCACGGTCACCATTG        |
