# Supplementary material for: Pre-Operative Decitabine in Colon Cancer Patients: Analyses on WNT Target Methylation and Expression
Source: MDPI journal article supplement (doi:10.3390/cancers13102357), 2021-05-13
Supplement: s1 [file s1]

| Patient sample                  | RIN value |
|---------------------------------|-----------|
| Patient 1, biopsy 1             | 7         |
| Patient 1, biopsy 2             | 5.90      |
| Patient 1, resection specimen 1 | 6.30      |
| Patient 1, resection specimen 2 | 7.60      |
| Patient 2, biopsy 1             | 8.70      |
| Patient 2, biopsy 2             | 8.30      |
| Patient 2, resection specimen 1 | 7.50      |
| Patient 2, resection specimen 2 | 8.20      |
| Patient 3, biopsy 1             | 8.20      |
| Patient 3, biopsy 2             | 7.80      |
| Patient 3, resection specimen 1 | n/a       |
| Patient 3, resection specimen 2 | n/a       |
| Patient 4, biopsy 1             | 7.20      |
| Patient 4, biopsy 2             | 7.70      |
| Patient 4, resection specimen 1 | 7.90      |
| Patient 4, resection specimen 2 | 8.80      |
| Patient 5, biopsy 1             | 6.90      |
| Patient 5, biopsy 2             | 7.10      |
| Patient 5, resection specimen 1 | 7.70      |
| Patient 5, resection specimen 2 | 8.80      |
