# Supplementary material for: Pre-Operative Decitabine in Colon Cancer Patients: Analyses on WNT Target Methylation and Expression
Source: MDPI journal article supplement (doi:10.3390/cancers13102357), 2021-05-13
Supplement: s1 [file s1]

Table S5: Adverse Events

| Grade 1                      | Number of patients |
|------------------------------|--------------------|
| Flatulence                   | 1                  |
| Nervousness during the night | 1                  |
| Constipation                 | 2                  |
| Nausea                       | 1                  |
| Headache                     | 1                  |
| Paresthia in right leg       | 1                  |
